# Supplementary material for: Impact of scanner variability on lymph node segmentation in computational pathology
Source: PubMed Central journal article supplement — J Pathol Inform. 2022 Jul 25;13:100127. doi: 10.1016/j.jpi.2022.100127 (PMC9577043; doi:10.1016/j.jpi.2022.100127), 2022-07-25
Supplement: mmc1.pdf [file mmc1.pdf]

Model: "Modified U-Net"

| Layer (type)                        | Output Shape          | Param # | Connected to                |
|-------------------------------------|-----------------------|---------|-----------------------------|
| input_1 (InputLayer)                | [(None, 512, 512, 3)] | 0       |                             |
| conv2d (Conv2D)                     | (None, 512, 512, 32)  | 896     | input_1[0][0]               |
| leaky_re_lu (LeakyReLU)             | (None, 512, 512, 32)  | 0       | conv2d[0][0]                |
| batch_normalization (BatchNormaliza | (None, 512, 512, 32)  | 128     | leaky_re_lu[0][0]           |
| dropout (Dropout)                   | (None, 512, 512, 32)  | 0       | batch_normalization[0][0]   |
| conv2d_1 (Conv2D)                   | (None, 512, 512, 32)  | 9248    | dropout[0][0]               |
| leaky_re_lu_1 (LeakyReLU)           | (None, 512, 512, 32)  | 0       | conv2d_1[0][0]              |
| batch_normalization_1 (BatchNor     | (None, 512, 512, 32)  | 128     | leaky_re_lu_1[0][0]         |
| max_pooling2d (MaxPooling2D)        | (None, 256, 256, 32)  | 0       | batch_normalization_1[0][0] |
| conv2d_2 (Conv2D)                   | (None, 256, 256, 64)  | 18496   | max_pooling2d[0][0]         |
| leaky_re_lu_2 (LeakyReLU)           | (None, 256, 256, 64)  | 0       | conv2d_2[0][0]              |
| batch_normalization_2 (BatchNor     | (None, 256, 256, 64)  | 256     | leaky_re_lu_2[0][0]         |
| dropout_1 (Dropout)                 | (None, 256, 256, 64)  | 0       | batch_normalization_2[0][0] |
| conv2d_3 (Conv2D)                   | (None, 256, 256, 64)  | 36928   | dropout_1[0][0]             |
| leaky_re_lu_3 (LeakyReLU)           | (None, 256, 256, 64)  | 0       | conv2d_3[0][0]              |
| batch_normalization_3 (BatchNor     | (None, 256, 256, 64)  | 256     | leaky_re_lu_3[0][0]         |
| max_pooling2d_1 (MaxPooling2D)      | (None, 128, 128, 64)  | 0       | batch_normalization_3[0][0] |
| conv2d_4 (Conv2D)                   | (None, 128, 128, 128) | 73856   | max_pooling2d_1[0][0]       |
| leaky_re_lu_4 (LeakyReLU)           | (None, 128, 128, 128) | 0       | conv2d_4[0][0]              |
| batch_normalization_4 (BatchNor     | (None, 128, 128, 128) | 512     | leaky_re_lu_4[0][0]         |
| dropout_2 (Dropout)                 | (None, 128, 128, 128) | 0       | batch_normalization_4[0][0] |
| conv2d_5 (Conv2D)                   | (None, 128, 128, 128) | 147584  | dropout_2[0][0]             |
| leaky_re_lu_5 (LeakyReLU)           | (None, 128, 128, 128) | 0       | conv2d_5[0][0]              |
| batch_normalization_5 (BatchNor     | (None, 128, 128, 128) | 512     | leaky_re_lu_5[0][0]         |
| max_pooling2d_2 (MaxPooling2D)      | (None, 64, 64, 128)   | 0       | batch_normalization_5[0][0] |
| conv2d_6 (Conv2D)                   | (None, 64, 64, 256)   | 295168  | max_pooling2d_2[0][0]       |
| leaky_re_lu_6 (LeakyReLU)           | (None, 64, 64, 256)   | 0       | conv2d_6[0][0]              |
| batch_normalization_6 (BatchNor     | (None, 64, 64, 256)   | 1024    | leaky_re_lu_6[0][0]         |

|                                 |                       |         |                                                         |
|---------------------------------|-----------------------|---------|---------------------------------------------------------|
| dropout_3 (Dropout)             | (None, 64, 64, 256)   | 0       | batch_normalization_6[0][0]                             |
| conv2d_7 (Conv2D)               | (None, 64, 64, 256)   | 590080  | dropout_3[0][0]                                         |
| leaky_re_lu_7 (LeakyReLU)       | (None, 64, 64, 256)   | 0       | conv2d_7[0][0]                                          |
| batch_normalization_7 (BatchNor | (None, 64, 64, 256)   | 1024    | leaky_re_lu_7[0][0]                                     |
| max_pooling2d_3 (MaxPooling2D)  | (None, 32, 32, 256)   | 0       | batch_normalization_7[0][0]                             |
| conv2d_8 (Conv2D)               | (None, 32, 32, 512)   | 1180160 | max_pooling2d_3[0][0]                                   |
| leaky_re_lu_8 (LeakyReLU)       | (None, 32, 32, 512)   | 0       | conv2d_8[0][0]                                          |
| batch_normalization_8 (BatchNor | (None, 32, 32, 512)   | 2048    | leaky_re_lu_8[0][0]                                     |
| dropout_4 (Dropout)             | (None, 32, 32, 512)   | 0       | batch_normalization_8[0][0]                             |
| conv2d_9 (Conv2D)               | (None, 32, 32, 512)   | 2359808 | dropout_4[0][0]                                         |
| leaky_re_lu_9 (LeakyReLU)       | (None, 32, 32, 512)   | 0       | conv2d_9[0][0]                                          |
| batch_normalization_9 (BatchNor | (None, 32, 32, 512)   | 2048    | leaky_re_lu_9[0][0]                                     |
| conv2d_transpose (Conv2DTranspo | (None, 64, 64, 256)   | 524544  | batch_normalization_9[0][0]                             |
| concatenate (Concatenate)       | (None, 64, 64, 512)   | 0       | conv2d_transpose[0][0]<br>batch_normalization_7[0][0]   |
| conv2d_10 (Conv2D)              | (None, 64, 64, 256)   | 1179904 | concatenate[0][0]                                       |
| leaky_re_lu_10 (LeakyReLU)      | (None, 64, 64, 256)   | 0       | conv2d_10[0][0]                                         |
| batch_normalization_10 (BatchNo | (None, 64, 64, 256)   | 1024    | leaky_re_lu_10[0][0]                                    |
| dropout_5 (Dropout)             | (None, 64, 64, 256)   | 0       | batch_normalization_10[0][0]                            |
| conv2d_11 (Conv2D)              | (None, 64, 64, 256)   | 590080  | dropout_5[0][0]                                         |
| leaky_re_lu_11 (LeakyReLU)      | (None, 64, 64, 256)   | 0       | conv2d_11[0][0]                                         |
| batch_normalization_11 (BatchNo | (None, 64, 64, 256)   | 1024    | leaky_re_lu_11[0][0]                                    |
| conv2d_transpose_1 (Conv2DTrans | (None, 128, 128, 64)  | 65600   | batch_normalization_11[0][0]                            |
| concatenate_1 (Concatenate)     | (None, 128, 128, 192) | 0       | conv2d_transpose_1[0][0]<br>batch_normalization_5[0][0] |
| conv2d_12 (Conv2D)              | (None, 128, 128, 128) | 221312  | concatenate_1[0][0]                                     |
| leaky_re_lu_12 (LeakyReLU)      | (None, 128, 128, 128) | 0       | conv2d_12[0][0]                                         |
| batch_normalization_12 (BatchNo | (None, 128, 128, 128) | 512     | leaky_re_lu_12[0][0]                                    |
| dropout_6 (Dropout)             | (None, 128, 128, 128) | 0       | batch_normalization_12[0][0]                            |
| conv2d_13 (Conv2D)              | (None, 128, 128, 128) | 147584  | dropout_6[0][0]                                         |

|                                              |                            |                                                         |
|----------------------------------------------|----------------------------|---------------------------------------------------------|
| leaky_re_lu_13 (LeakyReLU)                   | (None, 128, 128, 128) 0    | conv2d_13[0][0]                                         |
| batch_normalization_13 (Batch Normalization) | (None, 128, 128, 128) 512  | leaky_re_lu_13[0][0]                                    |
| conv2d_transpose_2 (Conv2DTranspose)         | (None, 256, 256, 32) 16416 | batch_normalization_13[0][0]                            |
| concatenate_2 (Concatenate)                  | (None, 256, 256, 96) 0     | conv2d_transpose_2[0][0]<br>batch_normalization_3[0][0] |
| conv2d_14 (Conv2D)                           | (None, 256, 256, 64) 55360 | concatenate_2[0][0]                                     |
| leaky_re_lu_14 (LeakyReLU)                   | (None, 256, 256, 64) 0     | conv2d_14[0][0]                                         |
| batch_normalization_14 (Batch Normalization) | (None, 256, 256, 64) 256   | leaky_re_lu_14[0][0]                                    |
| dropout_7 (Dropout)                          | (None, 256, 256, 64) 0     | batch_normalization_14[0][0]                            |
| conv2d_15 (Conv2D)                           | (None, 256, 256, 64) 36928 | dropout_7[0][0]                                         |
| leaky_re_lu_15 (LeakyReLU)                   | (None, 256, 256, 64) 0     | conv2d_15[0][0]                                         |
| batch_normalization_15 (Batch Normalization) | (None, 256, 256, 64) 256   | leaky_re_lu_15[0][0]                                    |
| conv2d_transpose_3 (Conv2DTranspose)         | (None, 512, 512, 16) 4112  | batch_normalization_15[0][0]                            |
| concatenate_3 (Concatenate)                  | (None, 512, 512, 48) 0     | conv2d_transpose_3[0][0]<br>batch_normalization_1[0][0] |
| conv2d_16 (Conv2D)                           | (None, 512, 512, 32) 13856 | concatenate_3[0][0]                                     |
| leaky_re_lu_16 (LeakyReLU)                   | (None, 512, 512, 32) 0     | conv2d_16[0][0]                                         |
| batch_normalization_16 (Batch Normalization) | (None, 512, 512, 32) 128   | leaky_re_lu_16[0][0]                                    |
| dropout_8 (Dropout)                          | (None, 512, 512, 32) 0     | batch_normalization_16[0][0]                            |
| conv2d_17 (Conv2D)                           | (None, 512, 512, 32) 9248  | dropout_8[0][0]                                         |
| leaky_re_lu_17 (LeakyReLU)                   | (None, 512, 512, 32) 0     | conv2d_17[0][0]                                         |
| batch_normalization_17 (Batch Normalization) | (None, 512, 512, 32) 128   | leaky_re_lu_17[0][0]                                    |
| conv2d_18 (Conv2D)                           | (None, 512, 512, 1) 33     | batch_normalization_17[0][0]                            |
| =====                                        |                            |                                                         |
| Total params: 7,588,977                      |                            |                                                         |
| Trainable params: 7,583,089                  |                            |                                                         |
| Non-trainable params: 5,888                  |                            |                                                         |
